# Supplementary material for: Identification of Novel lncRNAs Differentially Expressed in Placentas of Chinese Ningqiang Pony and Yili Horse Breeds
Source: Animals (Basel). 2020 Jan 11;10(1):119. doi: 10.3390/ani10010119 (PMC7022612; doi:10.3390/ani10010119)
Supplement: Supplementary file 1 [file animals-10-00119-s001.xlsx]

## Sheet: Sheet1
TableS1 Quality control of clean reads
Fastq_name	File_size	Total_reads	Base_count	Read_length	Error_rate	Q20	Q30	GC_content
NQ3.R1	3.47G	42898876	5.99G	150	0.11%	98.74%	96.61%	50.44%
NQ3.R2	3.82G	42898876	5.99G	150	0.25%	97.04%	93.33%	50.57%
NQ4.R1	3.84G	47956743	6.70G	150	0.10%	98.84%	96.81%	51.16%
NQ4.R2	4.20G	47956743	6.70G	150	0.23%	97.38%	93.99%	51.27%
NQ5.R1	3.44G	39347610	5.53G	151	0.23%	97.45%	93.81%	50.40%
NQ5.R2	4.03G	39347610	5.53G	151	0.72%	92.08%	83.32%	50.67%
NQ6.R1	3.92G	47046729	6.57G	150	0.13%	98.45%	95.63%	50.71%
NQ6.R2	4.32G	47046729	6.57G	150	0.30%	96.39%	91.81%	50.76%
YL1.R1	3.73G	44764522	6.25G	150	0.13%	98.48%	95.67%	50.34%
YL1.R2	4.11G	44764522	6.25G	150	0.30%	96.37%	91.78%	50.38%
YL3.R1	3.89G	46736623	6.53G	150	0.13%	98.43%	95.60%	49.81%
YL3.R2	4.33G	46736623	6.53G	150	0.33%	95.98%	91.12%	49.87%
YL4.R1	3.70G	44464644	6.21G	150	0.12%	98.53%	95.77%	50.36%
YL4.R2	4.12G	44464644	6.21G	150	0.31%	96.20%	91.44%	50.40%
YL5.R1	3.94G	47337328	6.61G	150	0.13%	98.45%	95.61%	51.36%
YL5.R2	4.35G	47337328	6.61G	150	0.30%	96.31%	91.68%	51.41%
YL6.R1	3.85G	46086918	6.44G	150	0.14%	98.37%	95.48%	49.82%
YL6.R2	4.26G	46086918	6.44G	150	0.32%	96.08%	91.31%	49.89%
